# Supplementary material
Source: PubMed Central journal article supplement (PMC4424973)
Supplement: Supp_Fig1.pdf [file Supp_Fig1.pdf]

## Supplementary Data

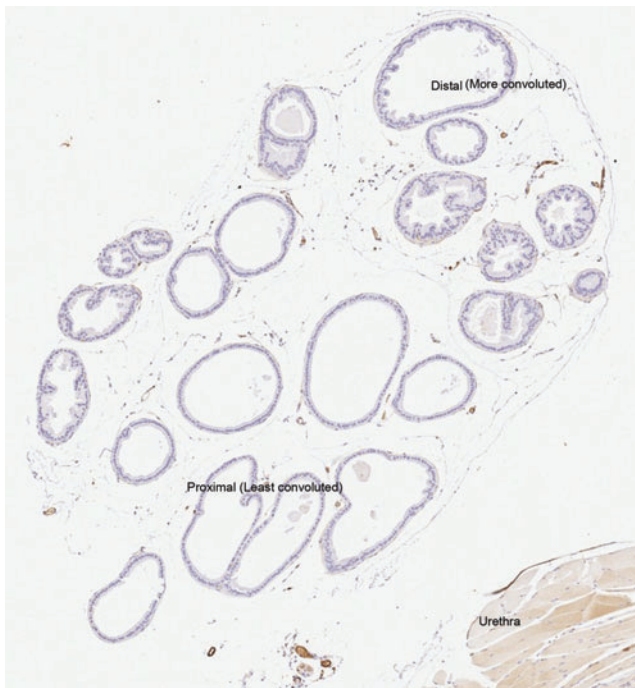

**SUPPLEMENTARY FIG. S1.** Immunohistochemistry staining using antibody against *Abcg2* (*brown*) showing *Abcg2* expression in murine ventral prostate. Proximal prostate ducts are the least convoluted.
