# Supplementary material
Source: PubMed Central journal article supplement (PMC4424973)
Supplement: Supp_Fig2.pdf [file Supp_Fig2.pdf]

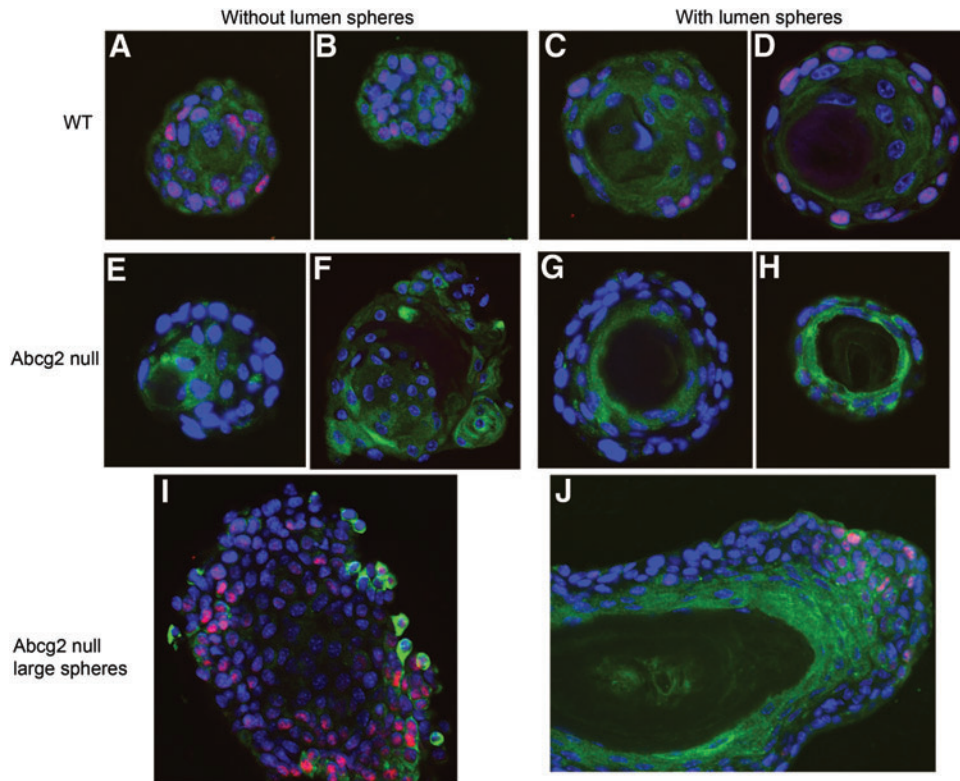

**SUPPLEMENTARY FIG. S2.** Dual immunofluorescence staining using antibody against p63 (*red*), and cytokeratin 5 (CK5) (*green*) shows heterogeneity in the staining pattern. (**A, B**) Without lumen spheres derived from wild-type (WT) prostate cells. (**C, D**) Spheres with lumen derived from WT prostate cells. (**E, F**) Without lumen spheres derived from Abcg2 null prostate cells. (**G, H**) With lumen spheres derived from Abcg2 null prostate cells. (**I, J**) Large spheres derived from Abcg2 null prostate cells showing a higher number of p63<sup>+</sup> cells.
