# Supplementary material
Source: PubMed Central journal article supplement (PMC4424973)
Supplement: Supp_Fig3.pdf [file Supp_Fig3.pdf]

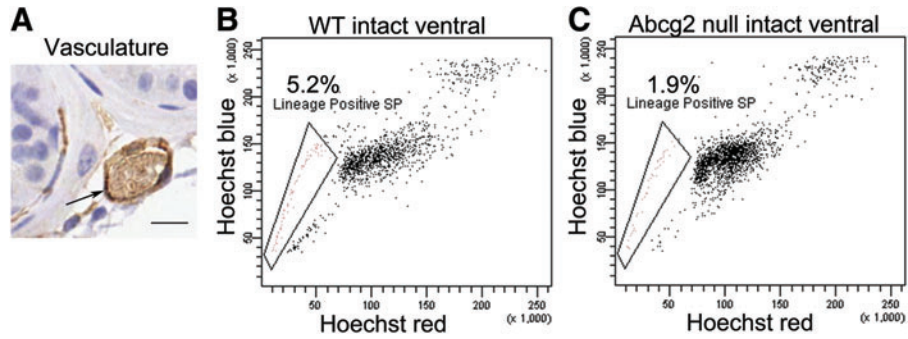

**SUPPLEMENTARY FIG. S3.** (A) Immunohistochemistry staining using antibody against Abcg2 (*brown*) showing Abcg2 expression in the vasculature of murine prostate (*arrow*), bar = 20  $\mu\text{m}$ . (B) Side population analysis showing 5.2%  $\text{Lin}^+$  side population of total  $\text{Lin}^+$  WT prostate cells and (C) 1.9%  $\text{Lin}^+$  side population of total  $\text{Lin}^+$  Abcg2 null prostate cells from a representative experiment.
